# Supplementary material for: Identification of nutritional components in unripe and ripe Docynia delavayi (Franch.) Schneid fruit by widely targeted metabolomics
Source: PeerJ journal article supplement (doi:10.7717/peerj.14441), 2022-12-12

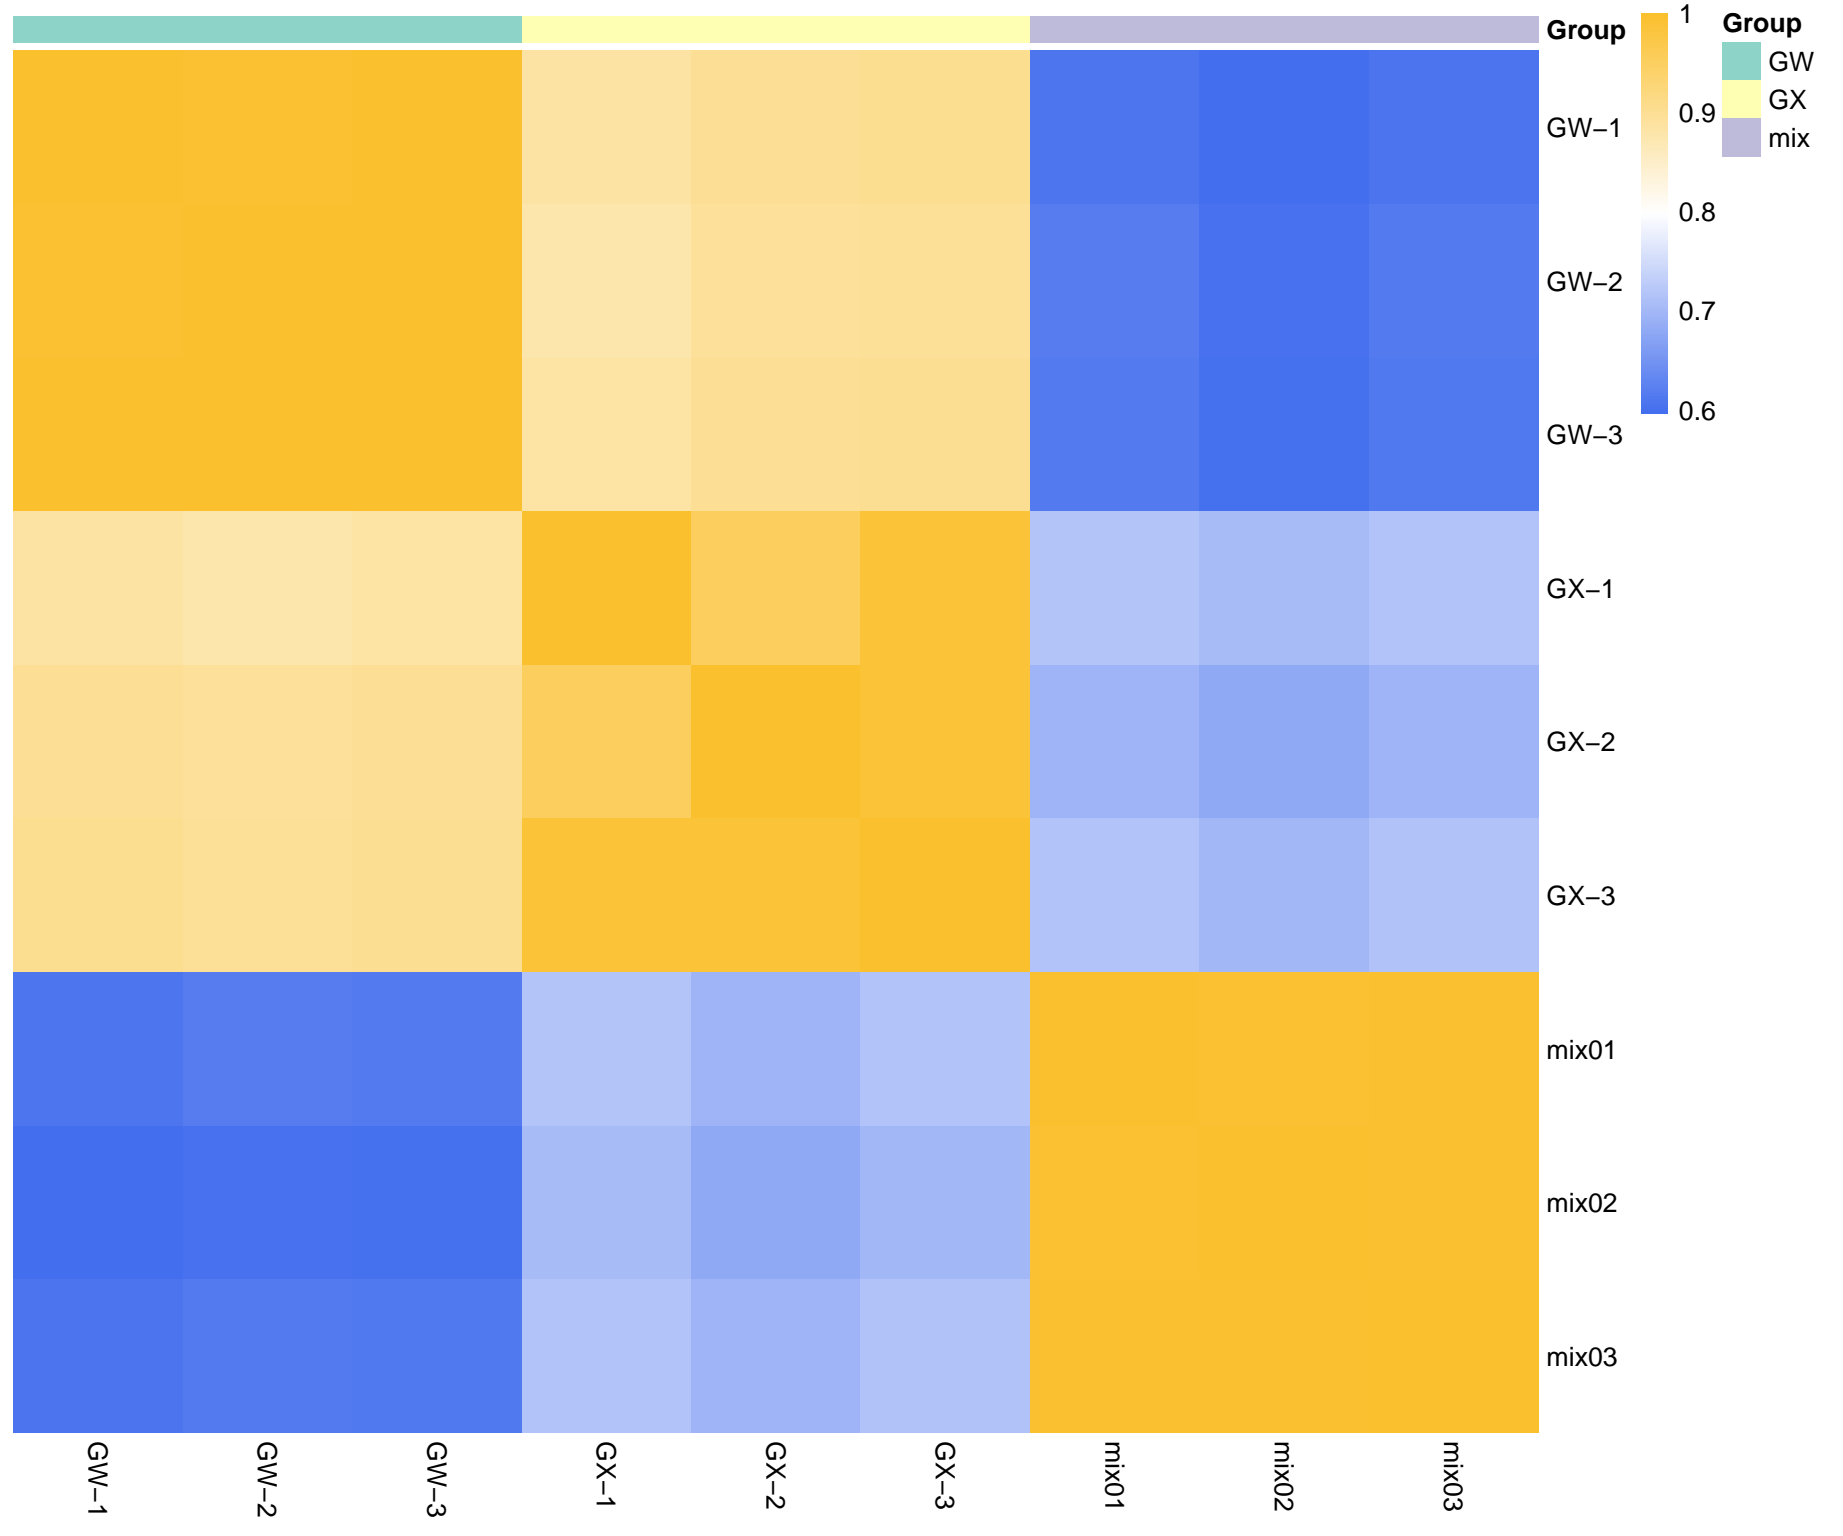

Supplement: Plot_70867_JT_staff.pdf [file Plot_70867_JT_staff.pdf]
