# Supplementary material for: Identification of nutritional components in unripe and ripe Docynia delavayi (Franch.) Schneid fruit by widely targeted metabolomics
Source: PeerJ. 2022 Dec 12;10:e14441. doi: 10.7717/peerj.14441 (PMC9753743; doi:10.7717/peerj.14441)
Supplement: Supplemental Information 4 [file peerj-10-14441-s004.xlsx]

## Sheet: Sheet1
Index	Formula	Compounds	Class I	Class II	CAS	Level	GW-1	GW-2	GW-3	GX-1	GX-2	GX-3	VIP	Fold_Change	Log2FC	Type	cpd_ID	kegg_map
pmb0484	C5H13NO	Choline	Alkaloids	Alkaloids	62-49-7	A	82800	95600	89200	1390000	182000	788000	1.05502	8.81913	3.14064	up	C00114	ko00260,ko00564,ko01100,ko02010
HJAP104	C7H6O	Benzaldehyde	Others	Others	100-52-7	B	65700	60500	63100	9	9	9	1.25514	0.000142631	-12.7754	down	--	--
pmp001287	C8H9N	N-Benzylmethylene isomethylamine	Alkaloids	Alkaloids	-	A	1220000	1220000	1220000	724000	173000	448000	1.01553	0.367486	-1.44424	down	--	--
mws0001	C4H8N2O3	L-Asparagine	Amino acids and derivatives	Amino acids and derivatives	70-47-3	B	1830000	1370000	1600000	260000	14600	137000	1.08169	0.08575	-3.54372	down	C00152	ko00250,ko00460,ko00970,ko01100,ko01110,ko01230
mws0219	C4H7NO4	L-AsparticAcid	Amino acids and derivatives	Amino acids and derivatives	56-84-8	A	1040000	1120000	1080000	763000	313000	538000	1.0358	0.498148	-1.00535	down	C00049	ko00220,ko00250,ko00260,ko00261,ko00270,ko00300,ko00340,ko00410,ko00460,ko00710,ko00760,ko00770,ko00970,ko01100,ko01110,ko01200,ko01210,ko01230,ko02010
pmb0374	C5H5N5	Aminopurine	Alkaloids	Alkaloids	452-06-2	A	9	9	9	15700	3030	9370	1.24237	1040.74	10.0234	up	--	--
pme0033	C5H4N4O	Hypoxanthine	Nucleotides and derivatives	Nucleotides and derivatives	68-94-0	B	6940	7850	7400	3240	3460	3350	1.24834	0.452907	-1.14271	down	C00262	ko00230,ko01100
mws1336	C7H7NO2	4-Aminobenzoic acid	Phenolic acids	Phenolic acids	150-13-0	B	222000	222000	222000	736000	677000	707000	1.25403	3.18318	1.67047	up	C00568	ko00790,ko01100
Hmgn001653	C7H6O3	3,4-Dihydroxybenzaldehyde	Phenolic acids	Phenolic acids	139-85-5	A	42900	69600	56300	18300	16800	17500	1.21748	0.311611	-1.68218	down	--	--
pme0014	C5H9NO4	L-Glutamic acid	Amino acids and derivatives	Amino acids and derivatives	56-86-0	A	19500000	17500000	18500000	9930000	5220000	7570000	1.16233	0.409369	-1.28852	down	C00025	ko00220,ko00250,ko00330,ko00332,ko00340,ko00430,ko00480,ko00630,ko00650,ko00660,ko00860,ko00910,ko00970,ko01100,ko01110,ko01200,ko01210,ko01230,ko02010
mws0458	C8H8O3	Vanillin	Phenolic acids	Phenolic acids	121-33-5	B	998000	859000	929000	271000	278000	275000	1.25209	0.295765	-1.75748	down	C00755	ko00998,ko01100,ko01110
pme0021	C9H11NO2	L-Phenylalanine	Amino acids and derivatives	Amino acids and derivatives	63-91-2	A	4790000	5100000	4940000	2880000	652000	1770000	1.01298	0.357519	-1.48391	down	C00079	ko00360,ko00400,ko00460,ko00940,ko00960,ko00966,ko00970,ko00998,ko01100,ko01110,ko01210,ko01230,ko02010
pme0181	C7H11N3O2	1-Methylhistidine	Amino acids and derivatives	Amino acids and derivatives	368-16-1	B	124000	119000	122000	29100	41400	35300	1.23842	0.289863	-1.78656	down	C01152	ko00340,ko01100
Hmfn00531	C6H8O6	L-Ascorbic acid	Others	Vitamin	50-81-7	A	10200	22300	16300	171000	189000	180000	1.23445	11.0656	3.46801	up	C00072	ko00053,ko00480,ko01100,ko01110
Hmtn001288	C9H10O4	Methyl-(2,4-dihydroxyphenyl)acetate	Phenolic acids	Phenolic acids	-	B	5560	3810	4680	11000	9190	10100	1.19752	2.15587	1.10827	up	--	--
Hmjp002337	C10H8O4	Isoscopoletin (6-Hydroxy-7-Methoxycoumarin)	Lignans and Coumarins	Coumarins	776-86-3	B	43700	41200	42400	111000	94600	103000	1.24725	2.42419	1.27751	up	--	--
mws2125	C3H4KO6P	Phosphoenolpyruvic acid	Organic acids	Organic acids	4265-07-0	B	87200	101000	94200	52600	38100	45300	1.20911	0.481586	-1.05413	down	--	--
pme3443	C11H12O4	Sinapinaldehyde	Phenolic acids	Phenolic acids	4206-58-0	B	542000	494000	518000	120000	124000	122000	1.25428	0.235521	-2.08607	down	C05610	ko00940,ko01100,ko01110
pmb2620	C11H12O4	3,4-Dimethoxycinnamic acid	Phenolic acids	Phenolic acids	14737-89-4	B	9	9	9	4610	1030	2820	1.23977	313.333	8.29155	up	--	--
mws1337	C9H17NO5	D-Pantothenic Acid	Others	Vitamin	79-83-4	B	403000	421000	412000	239000	173000	206000	1.21215	0.5	-1	down	C00864	ko00410,ko00770,ko01100,ko01110
Hmyp002656	C11H11NO4	Methyl dioxindole-3-acetate	Others	Others	57061-18-4	B	8250	12400	10300	18100	28400	23300	1.15271	2.25525	1.17329	up	--	--
pme3732	C9H13N3O5	Cytidine	Nucleotides and derivatives	Nucleotides and derivatives	65-46-3	B	105000	86800	96100	363000	166000	265000	1.12973	2.7579	1.46357	up	C00475	ko00240,ko01100,ko02010
pmb2591	C13H14N2O3	Acetyltryptophan	Amino acids and derivatives	Amino acids and derivatives	2280/1/5	A	568000	679000	624000	5320000	7100000	6210000	1.25079	9.95724	3.31575	up	C03137	--
mws1038	C11H22N2O4S	(R)-Pantetheine	Others	Others	496-65-1	B	596	1010	803	3430	2030	2730	1.18473	3.39975	1.76543	up	C00831	ko00332,ko00770,ko01110
mws0366	C18H30O2	γ-Linolenic Acid	Lipids	Free fatty acids	506-26-3	A	645000	497000	571000	2080000	1730000	1910000	1.24034	3.33917	1.73949	up	C06426	ko00591,ko01040,ko01100
mws0367	C18H30O2	α-Linolenic Acid	Lipids	Free fatty acids	463-40-1	A	640000	524000	582000	2020000	1760000	1890000	1.24601	3.24742	1.6993	up	C06427	ko00592,ko01040,ko01100,ko01110
pmb0889	C18H30O2	Punicic acid	Lipids	Free fatty acids	544-72-9	B	21700	28900	25300	172000	95600	134000	1.22346	5.29117	2.40359	up	C08364	--
mws2623	C18H34O2	11-Octadecanoic acid(Vaccenic acid)	Lipids	Free fatty acids	506-17-2	A	1110000	1300000	1210000	3620000	3080000	3350000	1.24525	2.77624	1.47313	up	--	--
mws0396	C18H34O2	Elaidic Acid	Lipids	Free fatty acids	112-79-8	A	3170000	3570000	3370000	10900000	8400000	9650000	1.23993	2.8635	1.51778	up	--	--
pme3233	C16H12O5	Calycosin	Flavonoids	Isoflavones	20575-57-9	B	59700	62100	60900	292000	208000	250000	1.2429	4.10509	2.03741	up	C01562	ko00943,ko01110
mws1521	C13H18O7	Salicin	Phenolic acids	Phenolic acids	138-52-3	A	10400	4590	7470	2480	4310	3390	1.00455	0.45325	-1.14162	down	C01451	ko00010
pmn001728	C15H18N2O4	N-Acetyl-DL-tryptophan	Amino acids and derivatives	Amino acids and derivatives	87-32-1	A	188000	179000	183000	1110000	1380000	1250000	1.2523	6.8	2.76553	up	--	--
pmb2786	C18H30O3	9-HOTrE	Lipids	Free fatty acids	89886-42-0	B	4600	5400	5000	30700	10200	20400	1.12526	4.08667	2.03092	up	--	--
pmb2799	C18H32O3	12,13-EODE	Lipids	Free fatty acids	6799-85-5	A	1040	1500	1270	4980	3700	4340	1.22604	3.41732	1.77287	up	--	--
pmn001688	C18H32O3	9S-Hyroxy-10E,12E-octadecadienoic acid	Lipids	Free fatty acids	-	A	27600	28700	28100	183000	108000	145000	1.2333	5.16588	2.36901	up	--	--
mws0044	C15H12O7	Dihydroquercetin(Taxifolin)	Flavonoids	Dihydroflavonol	480-18-2	A	193000	162000	178000	50700	32300	41500	1.23323	0.233583	-2.09799	down	C01617	ko00941,ko01100,ko01110
Rfmb087	C18H32O4	13-Oxo-9-hydroxy-10-octadecenoic acid	Lipids	Free fatty acids	-	B	2650	3560	3110	14900	6060	10500	1.13403	3.37554	1.75512	up	--	--
Rfmb089	C18H34O4	9,10-Dihydroxy-12-octadecenoic acid	Lipids	Free fatty acids	263399-34-4	B	45600	40400	43000	12100	11500	11800	1.25317	0.274419	-1.86555	down	--	--
Hmtn001120	C14H20O8	5-(2-Hydroxyethyl)-2-O-glucosylohenol	Phenolic acids	Phenolic acids	-	A	304000	272000	288000	760000	735000	748000	1.25183	2.59606	1.37633	up	--	--
pmn001518	C13H16O10	1-O-Galloyl-β-D-glucose	Phenolic acids	Phenolic acids	58511-73-2	B	2900000	3250000	3070000	1540000	1350000	1440000	1.24397	0.469631	-1.0904	down	--	--
HmLn000873	C13H16O10	2-O-Galloyl-β-D-glucose	Tannins	Tannin	-	B	9	9	9	182000	115000	149000	1.25466	16518.5	14.0118	up	--	--
Hmln002806	C16H16O8	3-O-Caffeoylshikimic acid	Phenolic acids	Phenolic acids	180981-12-8	A	173000	159000	166000	78200	69500	73800	1.24874	0.444779	-1.16884	down	--	--
Lmcp007240	C19H18O6	5,7,8,4'-Tetramethoxyflavone	Flavonoids	Flavonoid	6601-66-7	B	733	760	746	513000	7560	260000	1.10801	348.62	8.44551	up	--	--
Lmtn000940	C14H18O10	1-O-(3,4-dihydroxy-5-methoxy-benzoyl)-β-D-glucoside	Phenolic acids	Phenolic acids	-	B	32400	32100	32300	580000	585000	582000	1.25513	18.0475	4.17373	up	--	--
pmb0981	C10H14N5O7P	Adenosine 5'-monophosphate	Nucleotides and derivatives	Nucleotides and derivatives	61-19-8	B	17500	15300	16400	68000	22200	45100	1.01815	2.75	1.45943	up	C00020	ko00230,ko00908,ko01100,ko01110
pmb2444	C21H36O4	MAG(18:3)isomer1	Lipids	Glycerol ester	-	A	62100	43000	52500	173000	130000	151000	1.21604	2.88071	1.52642	up	--	--
pmb0890	C21H38O4	MAG(18:2)	Lipids	Glycerol ester	-	A	48500	40700	44600	734000	700000	717000	1.25412	16.0762	4.00686	up	--	--
Lmdn004267	C20H22O6	Epipinoresinol	Lignans and Coumarins	Lignans	24404-50-0	B	39100	40100	39600	16800	7220	12000	1.1683	0.303199	-1.72166	down	--	--
mws0097	C20H22O6	Pinoresinol	Lignans and Coumarins	Lignans	487-36-5	B	61700	56400	59100	16800	15000	15900	1.25276	0.269187	-1.89332	down	C05366	ko00998,ko01110
pmb3107	C15H20O10	Glucosyringic Acid	Phenolic acids	Phenolic acids	-	A	2640000	2510000	2580000	1130000	1180000	1150000	1.25381	0.447607	-1.1597	down	--	--
Zmxp005324	C20H24O6	(7R，8S)-dihydrodehydrodiconiferyl alcohol	Lignans and Coumarins	Lignans	126253-41-6	B	195000	207000	201000	46000	49800	47900	1.25403	0.238308	-2.0691	down	--	--
mws0055	C20H20O7	Tangeretin	Flavonoids	Flavonols	481-53-8	A	15000	10200	12600	5010000	158000	2580000	1.14038	204.974	7.67929	up	C10190	--
mws0043	C21H22O8	Nobiletin	Flavonoids	Flavonoid	478-01-3	A	28300	18000	23200	10200000	282000	5240000	1.1347	226.216	7.82156	up	C10112	--
Lmbp003668	C20H18O10	Kaempferol-3-arabinopyranoside	Flavonoids	Flavonoid	-	A	143000	151000	147000	385000	381000	383000	1.25454	2.60544	1.38153	up	--	--
pmp000383	C21H22O9	Liquiritin	Flavonoids	Dihydroflavone	551-15-5	B	704000	638000	671000	210000	253000	232000	1.24712	0.345256	-1.53426	down	C16989	--
Lmyp004617	C21H22O9	Pinocembrin 7-O-β-D-glucoside(Pinocembroside)	Flavonoids	Flavonoid	75829-43-5	A	171000	158000	165000	56100	59900	58000	1.25323	0.352227	-1.50542	down	--	--
pmn001663	C22H26O8	Syringaresinol	Lignans and Coumarins	Lignans	21453-69-0	B	69700	65100	67400	14300	15300	14800	1.25437	0.219585	-2.18715	down	C10889	--
pme0321	C21H20O10	Kaempferol-7-O-rhamnoside	Flavonoids	Flavonols	20196-89-8	B	32000	29400	30700	70900	60100	65500	1.24243	2.13355	1.09326	up	--	--
mws0919	C21H20O10	Kaempferol-3-O-rhamnoside (Afzelin)(Kaempferin)	Flavonoids	Flavonols	482-39-3	B	50200	37000	43600	108000	90600	99100	1.21813	2.27599	1.1865	up	C16911	ko00944
pmp000117	C22H24O9	3,5,6,7,8,3',4'-Heptamethoxyflavone	Flavonoids	Flavonols	1178-24-1	B	2930	2610	2770	239000	11100	125000	1.08591	45.1384	5.49628	up	--	--
pme1611	C21H22O10	Isohemiphloin	Flavonoids	Flavonoid carbonoside	3682/2/8	B	21500	28700	25100	74200	49500	61800	1.19551	2.46348	1.3007	up	--	--
mws1397	C22H18O10	Epicatechin gallate	Flavonoids	Flavanols	1257-08-5	B	8330	4940	6640	9	9	9	1.25396	0.0013561	-9.52632	down	--	--
pme3400	C22H22O10	Sissotrin	Flavonoids	Isoflavones	5928-26-7	B	1350	1930	1640	25700	19400	22500	1.24913	13.7398	3.78029	up	C05376	ko00943
Hmpp003270	C21H20O11	Luteolin-4'-O-β-D-glucoside*	Flavonoids	Flavonoid	6920-38-3	A	2750000	2470000	2610000	7720000	6430000	7080000	1.2455	2.71137	1.43902	up	--	--
mws2209	C21H20O11	Kaempferol-3-O-glucoside (Astragalin)*	Flavonoids	Flavonols	480-10-4	A	1670000	1720000	1700000	5060000	4950000	5010000	1.25495	2.95088	1.56115	up	C12249	ko00944,ko01110
pmp000263	C30H46O3	Sanguisorbigenin	Terpenoids	Triterpene	-	A	41200	41300	41300	84200	92000	88100	1.25234	2.13489	1.09417	up	--	--
Lmzn001894	C21H18O12	Kaempferol-3-O-β-D-glucuronide	Flavonoids	Flavonols	-	B	26200	21900	24000	152000	78400	115000	1.21473	4.79057	2.2602	up	--	--
Zmhn003191	C22H22O11	Isoscoparin	Flavonoids	Flavonoid	20013-23-4	B	132000	109000	120000	407000	367000	387000	1.24763	3.21607	1.6853	up	C05990	--
pmb2999	C22H22O11	Chrysoeriol-5-O-hexoside	Flavonoids	Flavonoid	-	B	3810000	3900000	3860000	11600000	12700000	12100000	1.2538	3.14607	1.65355	up	--	--
mws0091	C21H20O12	Quercetin-3-O-β-D-glucoside(Isoquercitrin)*	Flavonoids	Flavonols	482-35-9	A	3410000	3800000	3600000	7230000	9690000	8460000	1.22802	2.34783	1.23133	up	C05623	ko00944,ko01100,ko01110
mws0061	C21H20O12	Quercetin-3-O-β-D-Galactoside (Hyperin)*	Flavonoids	Flavonols	482-36-0	A	3790000	3390000	3590000	8000000	7530000	7770000	1.24923	2.16342	1.11331	up	C10073	--
pme1598	C22H24O11	Hesperetin 5-O-glucoside	Flavonoids	Dihydroflavonol	69651-80-5	B	458000	424000	441000	903000	969000	936000	1.25097	2.12245	1.08573	up	--	--
Xmsn002700	C21H22O12	Taxifolin-3'-O-β-D-glucoside	Flavonoids	Flavonoid	-	B	1110000	1090000	1100000	2500000	2280000	2390000	1.252	2.17273	1.11951	up	--	--
pmd0130	C22H46NO7P	LysoPC 14:0(2n isomer)	Lipids	LPC	-	B	958	918	938	4940	1520	3230	1.07062	3.4435	1.78387	up	--	--
pmn001704	C30H46O4	2,3-Dihydroxy 5(6),12(13)diene ursolic acid	Terpenoids	Triterpene	-	B	136000	159000	148000	346000	363000	354000	1.24828	2.39955	1.26276	up	--	--
Hmjn008136	C30H46O4	Camaldulenic acid	Terpenoids	Triterpene	71850-15-2	B	2870000	3360000	3120000	7680000	8010000	7850000	1.24903	2.51765	1.33208	up	--	--
pmp000266	C30H48O4	3β,19α-Dihydroxyolean-12-en-28-oic acid	Terpenoids	Triterpene	-	B	27500	25500	26500	54800	52900	53800	1.25204	2.03145	1.02251	up	--	--
pmb0545	C23H25O11+	Rosinidin O-hexoside	Flavonoids	Anthocyanins	-	B	57200	43900	50500	18500	15800	17100	1.23888	0.33905	-1.56043	down	--	--
pmb0856	C23H46NO7P	LysoPE 18:1(2n isomer)	Lipids	LPE	-	A	405000	355000	380000	109000	57300	83100	1.21924	0.218772	-2.1925	down	--	--
Lmdp002969	C21H20O13	Myricetin 3-O-galactoside	Flavonoids	Flavonols	15648-86-9	B	16300	6940	11600	138000	129000	133000	1.23034	11.4811	3.52118	up	--	--
pmn001707	C30H46O5	Quillaic acid	Phenolic acids	Phenolic acids	631-01-6	B	288000	270000	279000	2220000	1980000	2100000	1.25417	7.52688	2.91205	up	C08972	--
pmp000268	C30H46O5	Rosamultic acid	Terpenoids	Triterpene	14285-76-4	A	1500000	1510000	1500000	3050000	3060000	3050000	1.25511	2.03104	1.02222	up	--	--
Li512114	C31H50O4	Ursolic acid-OCH3	Terpenoids	Triterpene	-	A	2030000	1550000	1790000	4000000	4200000	4100000	1.23256	2.2905	1.19566	up	--	--
pmn001591	C30H48O5	Rutundic acid	Terpenoids	Triterpene	20137-37-5	A	60600	58100	59300	385000	391000	388000	1.25498	6.53933	2.70914	up	--	--
pmn001426	C30H48O5	Euscaphic acid	Terpenoids	Triterpene	53155-25-2	A	116000	107000	112000	502000	525000	513000	1.25428	4.59701	2.2007	up	C17890	--
pmp000269	C30H48O5	Arjunic Acid	Terpenoids	Triterpene	31298-06-3	A	167000	191000	179000	477000	541000	509000	1.24899	2.84358	1.50771	up	--	--
Zmhn003565	C23H22O12	Kaempferol-3-O-(6''-acetyl)-glucoside	Flavonoids	Flavonols	-	A	579000	742000	660000	3170000	3200000	3190000	1.2503	4.82585	2.27078	up	--	--
pmb0863	C24H46NO7P	LysoPC 16:2(2n isomer)	Lipids	LPC	-	B	11800	11000	11400	163000	140000	151000	1.25419	13.2749	3.73062	up	--	--
pmd0132	C24H50NO7P	LysoPC 16:0(2n isomer)	Lipids	LPC	-	A	87100	65200	76100	342000	196000	269000	1.20433	3.53327	1.82101	up	--	--
pmb3000	C24H24O12	Chrysoeriol-O-acetylhexoside	Flavonoids	Flavonoid	-	B	348000	335000	341000	1350000	1320000	1330000	1.25485	3.90625	1.96578	up	--	--
pmp000271	C30H48O6	1β,2α,3α,19α-Tetrahydroxyurs-12-en-28-oic acid	Terpenoids	Triterpene	-	A	15500	15800	15600	47300	79600	63500	1.22639	4.0597	2.02137	up	--	--
Hmln003605	C30H48O6	Myrianthic acid	Terpenoids	Triterpene	89786-84-5	A	25700	24900	25300	153000	163000	158000	1.25481	6.24506	2.64272	up	--	--
Hmln002199	C23H22O13	Quercetin-3-O-(6''-O-acetyl)-galactoside	Flavonoids	Flavonols	-	A	4270000	2500000	3390000	20300000	16800000	18500000	1.23224	5.47244	2.45218	up	--	--
pmb2406	C25H52NO7P	LysoPC 17:0	Lipids	LPC	50930-23-9	B	1180	1090	1130	5590	2110	3850	1.12416	3.39706	1.76429	up	--	--
pmn001644	C23H20O14	Quercetin-3-O-(2''-acetyl)-β-D-glucuronide	Flavonoids	Flavonols	-	B	26000	13400	19700	36900	42100	39500	1.10459	2.00508	1.00366	up	--	--
Hmln002483	C24H22O14	Kaempferol-3-O-(6''-malonyl)-glucoside	Flavonoids	Flavonols	-	A	258000	230000	244000	846000	888000	867000	1.25297	3.55328	1.82915	up	--	--
Hmln002100	C26H32O12	Nortrachelogenin 4-O-β-D-glucoside	Lignans and Coumarins	Lignans	-	B	80000	54000	67000	26100	33100	29600	1.19325	0.441791	-1.17856	down	--	--
pmp000589	C24H22O15	Quercetin-7-O-(6'-O-malonyl)-β-D-glucoside	Flavonoids	Flavonols	-	A	128000	118000	123000	424000	366000	395000	1.25064	3.21138	1.68319	up	--	--
Hmln002321	C24H22O15	Quercetin-3-O-(6''-O-malonyl)-glucoside	Flavonoids	Flavonols	-	A	71700	55500	63600	375000	368000	371000	1.25048	5.83857	2.54562	up	--	--
mws1138	C24H26N2O13	Betanin	Alkaloids	Alkaloids	7659-95-2	B	101000	86800	93800	379000	271000	325000	1.23663	3.46236	1.79175	up	--	--
HJAP064	C25H24O15	Isorhamnetin O-malonylglucoside	Flavonoids	Flavonoid	-	A	124000	109000	116000	294000	242000	268000	1.23864	2.30372	1.20397	up	--	--
Lmtp004126	C24H22O16	"Myricetin-3-O-(6""-malony)glucoside"	Flavonoids	Flavonols	-	A	3140	2530	2840	40100	27700	33900	1.2487	11.9506	3.57902	up	--	--
Zmxn004029	C31H38O11	7，8-dihydro-Buddlenol B (erythro)	Lignans and Coumarins	Lignans	-	B	4790000	4600000	4700000	1500000	1440000	1470000	1.2547	0.312988	-1.67582	down	--	--
Zmxn003874	C31H38O11	7，8-dihydro-Buddlenol B (threo)	Lignans and Coumarins	Lignans	-	B	7780000	7070000	7420000	1150000	1200000	1180000	1.25454	0.158509	-2.65736	down	--	--
mws1290	C30H26O13	Tiliroside	Flavonoids	Flavonols	20316-62-5	A	4820	5490	5150	148000	10500	79300	1.02664	15.3816	3.94314	up	C17140	--
HJN050	C27H30O15	Kaempferol-7-O-neohesperidoside	Flavonoids	Flavonoid	-	A	106000	104000	105000	513000	489000	501000	1.25488	4.77143	2.25442	up	--	--
pme0369	C27H30O15	Kaempferol-3-O-rutinoside(Nicotiflorin)	Flavonoids	Flavonols	17650-84-9	B	526000	570000	548000	2400000	2150000	2270000	1.2533	4.14842	2.05256	up	C21833	ko00944,ko01110
Lmpp003789	C30H27O13+	Cyanidin-3-O-(6''-p-Coumaroylglucoside)	Flavonoids	Anthocyanins	-	B	267000	219000	243000	1120000	997000	1060000	1.24981	4.35802	2.12367	up	C12095	ko00942
Lmlp002975	C26H28O16	Quercetin-3-O-β-D-xylopyranosyl-(1→2)-β-D-galactopyranoside	Flavonoids	Flavonoid	-	B	63300	47400	55300	342000	198000	270000	1.22326	4.87952	2.28674	up	--	--
Lmmp000897	C30H26O14	Gallocatechin-Gallocatechin	Flavonoids	Flavanols	-	B	21300	17800	19600	113000	113000	113000	1.25277	5.77513	2.52985	up	--	--
Lmyp004052	C30H26O14	Quercetin 3-O-(6''-trans-p-Coumaroyl)-β-D-galactopyranoside	Flavonoids	Flavonoid	-	B	6250	6460	6360	44600	46200	45400	1.25505	7.14211	2.83635	up	--	--
pmb0665	C27H30O16	Luteolin-8-C-hexosyl-O-hexoside	Flavonoids	Flavonoid	-	B	81700	67100	74400	379000	388000	384000	1.25189	5.15681	2.36648	up	--	--
Lmbp002592	C27H30O16	Kaempferol-3,7-di-O-β-D-glucopyranoside	Flavonoids	Flavonoid	-	B	17500	24100	20800	124000	88500	106000	1.23874	5.10417	2.35168	up	--	--
mws0059	C27H30O16	Quercetin-3-O-rutinoside (Rutin)	Flavonoids	Flavonols	153-18-4	A	3110000	3760000	3440000	15500000	17200000	16300000	1.25139	4.75267	2.24874	up	C05625	ko00944,ko01100,ko01110
Lmpp003662	C30H27O14+	Delphinidin-3-O-(6''-p-Coumaroylglucoside)	Flavonoids	Anthocyanins	-	B	1470000	1050000	1260000	6620000	6130000	6370000	1.24545	5.0582	2.33862	up	C16370	ko00942
Lmhp003217	C28H32O16	2'-Hydoxy,5-methoxy Genistein-O-rhamnosyl-glucoside	Flavonoids	Isoflavones	-	A	37900	43200	40600	131000	60100	95800	1.09212	2.35744	1.23722	up	--	--
pmp001311	C27H30O17	6-Hydroxykaempferol-7,6-O-Diglucoside	Flavonoids	Flavonols	-	A	82700	74700	78700	614000	622000	618000	1.25453	7.8526	2.97317	up	--	--
pmp001310	C27H30O17	6-Hydroxykaempferol-3,6-O-Diglucoside	Flavonoids	Flavonols	-	A	48900	46500	47700	289000	273000	281000	1.25469	5.89099	2.55851	up	--	--
pmp000596	C27H30O17	Quercetin-3,7-O-β-D-diglucoside	Flavonoids	Flavonols	-	A	9	9	9	33800	31700	32700	1.25512	3637.04	11.8285	up	--	--
pmb0618	C28H34O16	8-C-Hexosyl-hesperetin O-hexoside	Flavonoids	Flavonoid carbonoside	-	B	20000	15700	17800	208000	213000	210000	1.25293	11.7944	3.56003	up	--	--
Hmyp007792	C32H62NO9P	PE(oxo-11:0/16:0)	Lipids	Glycerol ester	-	B	292000	201000	246000	86700	80300	83500	1.23003	0.338972	-1.56076	down	--	--
pmp000780	C40H56O8	3-O-Trans-feruloyl euscaphic acid	Terpenoids	Triterpene	-	A	51700	50300	51000	5880	6630	6250	1.25442	0.122614	-3.0278	down	--	--
pmp001275	C31H61O14N	3-Hydroxypropyl palmitate glc-glucosamine	Alkaloids	Alkaloids	-	A	12000	16400	14200	47900	18900	33400	1.01974	2.35211	1.23396	up	--	--
pmp001276	C33H56O14	2,3-Dihydroxypropyl-9,12,15-octadecatrienoate-hexose-hexose	Lipids	Free fatty acids	-	B	56000	64100	60000	173000	100000	137000	1.16191	2.27651	1.18683	up	--	--
pmb0168	C38H70NO8P	PC 16:1/14:1	Lipids	PC	-	B	15300	12500	13900	6620	6270	6440	1.2403	0.463549	-1.10921	down	--	--
Hmyp007396	C37H68NO9P	PC(oxo-11:0/18:2)	Lipids	PC	-	A	177000	141000	159000	68200	61100	64600	1.23936	0.406499	-1.29868	down	--	--
pmb0706	C30H32O20	Quercetin-5-O-malonylhexosyl-hexoside	Flavonoids	Flavonols	-	A	16700	18800	17800	269000	274000	271000	1.25482	15.272	3.93282	up	--	--
pmb0709	C30H32O20	Quercetin-7-O-malonylhexosyl-hexoside	Flavonoids	Flavonols	-	A	20200	27600	23900	116000	157000	136000	1.24271	5.70432	2.51206	up	--	--
GQ512001	C33H40O21	Quercetin-O-rutinoside-hexose	Flavonoids	Flavonols	-	B	6340	9150	7750	133000	93900	114000	1.24801	14.6687	3.87467	up	--	--
Hmyp007589	C41H70NO11P	PE(18:3/18:3+O3)	Lipids	Glycerol ester	-	B	4500	5420	4960	1200	1750	1480	1.23046	0.297715	-1.748	down	--	--
